# Supplementary material
Source: Springer Nature journal article supplement (https://www.springermedizin.de/resource/supplementary/12885_2014_4556_MOESM1_ESM.pdf/9466706)

## Subgroups

## Core of the COLON-study

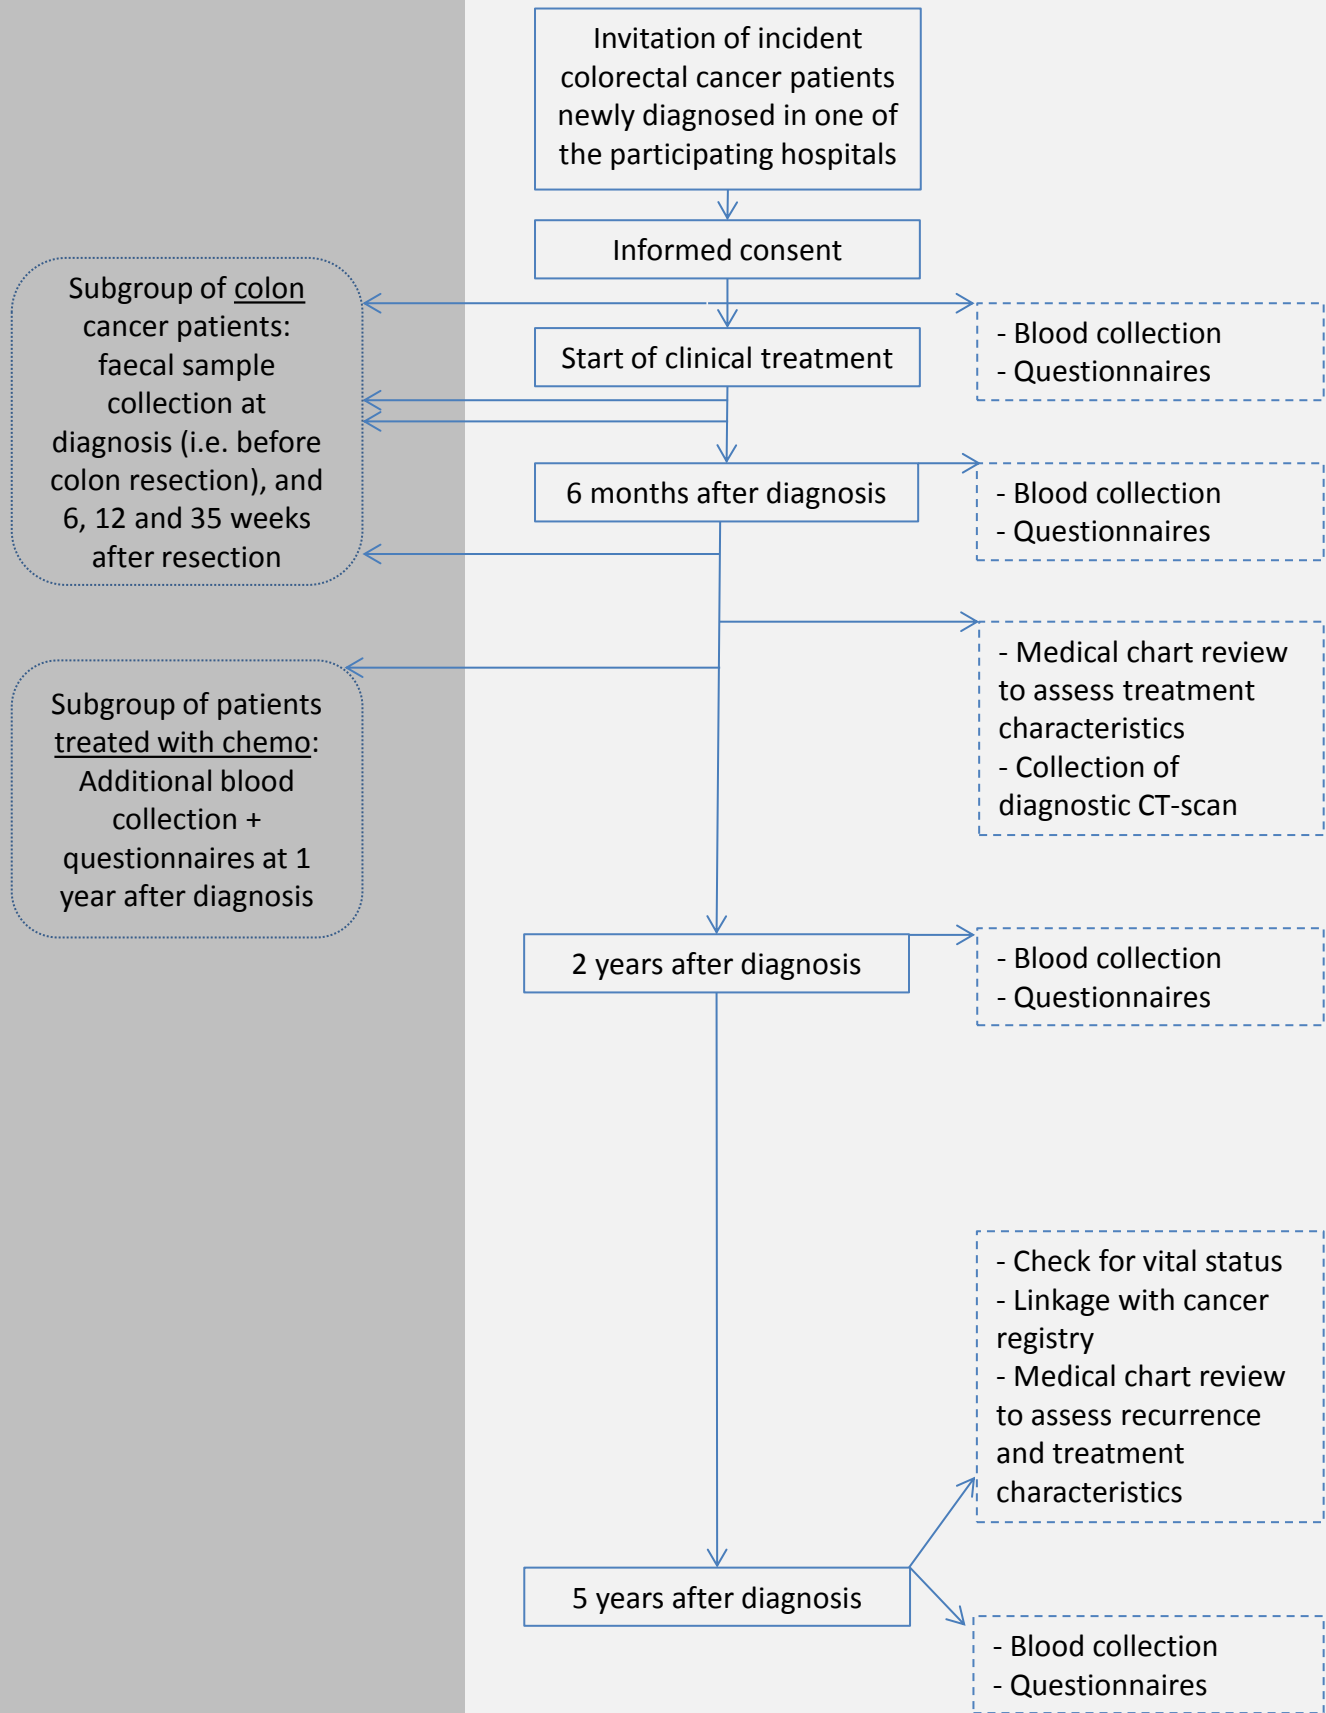

Supplement: MOESM1 [file 9466706]
